# Supplementary material for: The Impacts of Fish Oil and/or Probiotic Intervention on Low-Grade Inflammation, IGFBP-1 and MMP-8 in Pregnancy: A Randomized, Placebo-Controlled, Double-Blind Clinical Trial
Source: PubMed Central journal article supplement (PMC7822218; doi:10.3390/biom11010005), 2020-12-22
Supplement: biomolecules-11-00005-s001.pdf [file biomolecules-11-00005-s001.pdf]

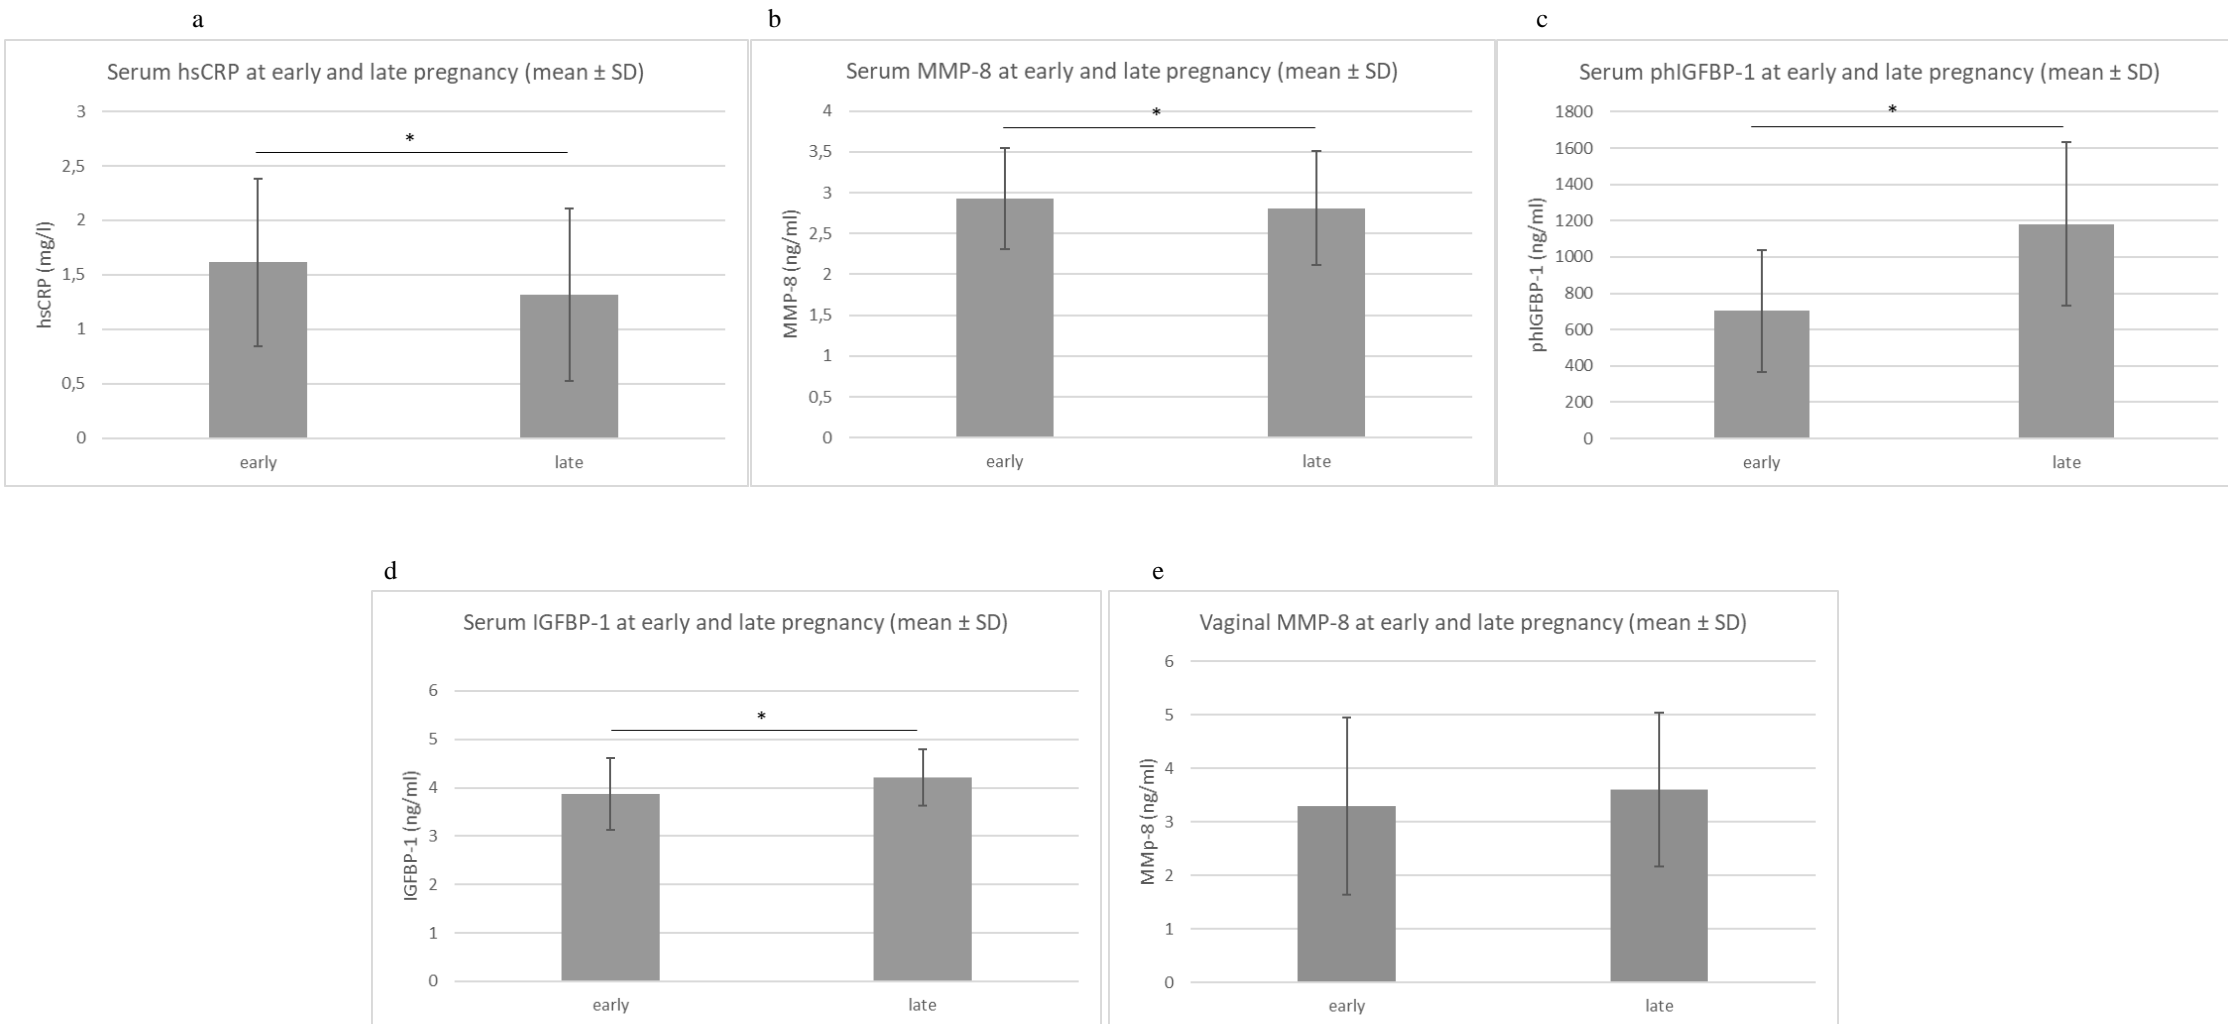

**Figure S1.** a, b, c, d and e. The concentrations of serum a) high sensitivity C-reactive protein (hsCRP), b) matrix metalloproteinase 8 (MMP-8), c) phosphorylated insulin-like growth factor binding-protein 1 (phIGFBP-1), d) IGFBP-1 and e) vaginal MMP-8 (mean  $\pm$  SD) in early and late pregnancy. ANOVA, \* $p < 0.05$ .
